# Supplementary material
Source: PubMed Central journal article supplement (PMC7160414)
Supplement: ONCO-25-e701-s002.pdf [file ONCO-25-e701-s002.pdf]

Supplemental Tables for:  
 Postoperative Radiotherapy in Pathological T2-3N0M0 Thoracic Esophageal Squamous Cell Carcinoma: Interim Report of a  
 Prospective, Phase III, Randomized Controlled Study  
 Wei Deng et al.

Table S1. Salvage therapies for patients had recurrent diseases

|                               | S alone group (n=29) | S + R group (n=18) | All patients (n=47) |
|-------------------------------|----------------------|--------------------|---------------------|
| Radiotherapy                  | 8                    | 0                  | 8                   |
| Chemotherapy                  | 4                    | 12                 | 16                  |
| Radiotherapy and chemotherapy | 15                   | 4                  | 19                  |
| Supportive care               | 0                    | 1                  | 1                   |
| None                          | 2                    | 1                  | 3                   |

Table S2. CONSORT statement

| Section/Topic                                        | Item No | Checklist item                                                                                                                                                                              | Reported on page No |
|------------------------------------------------------|---------|---------------------------------------------------------------------------------------------------------------------------------------------------------------------------------------------|---------------------|
| <b>Title and abstract</b>                            |         |                                                                                                                                                                                             |                     |
|                                                      | 1a      | Identification as a randomised trial in the title                                                                                                                                           | 1                   |
|                                                      | 1b      | Structured summary of trial design, methods, results, and conclusions                                                                                                                       | 3                   |
| <b>Introduction</b>                                  |         |                                                                                                                                                                                             |                     |
| Background and objectives                            | 2a      | Scientific background and explanation of rationale                                                                                                                                          | 4                   |
|                                                      | 2b      | Specific objectives or hypotheses                                                                                                                                                           | 4                   |
| <b>Methods</b>                                       |         |                                                                                                                                                                                             |                     |
| Trial design                                         | 3a      | Description of trial design (such as parallel, factorial) including allocation ratio                                                                                                        | 5-6                 |
|                                                      | 3b      | Important changes to methods after trial commencement (such as eligibility criteria), with reasons                                                                                          | -                   |
| Participants                                         | 4a      | Eligibility criteria for participants                                                                                                                                                       | 4-5                 |
|                                                      | 4b      | Settings and locations where the data were collected                                                                                                                                        | 4-5                 |
| Interventions                                        | 5       | The interventions for each group with sufficient details to allow replication, including how and when they were actually administered                                                       | 5-6                 |
| Outcomes                                             | 6a      | Completely defined pre-specified primary and secondary outcome measures, including how and when they were assessed                                                                          | 6                   |
|                                                      | 6b      | Any changes to trial outcomes after the trial commenced, with reasons                                                                                                                       | -                   |
| Sample size                                          | 7a      | How sample size was determined                                                                                                                                                              | 6-7                 |
|                                                      | 7b      | When applicable, explanation of any interim analyses and stopping guidelines                                                                                                                | 6-7                 |
|                                                      |         |                                                                                                                                                                                             |                     |
| Randomisation:                                       |         |                                                                                                                                                                                             |                     |
| Sequence generation                                  |         |                                                                                                                                                                                             |                     |
|                                                      | 8a      | Method used to generate the random allocation sequence                                                                                                                                      | 5                   |
|                                                      | 8b      | Type of randomisation; details of any restriction (such as blocking and block size)                                                                                                         | 5                   |
| Allocation concealment mechanism                     | 9       | Mechanism used to implement the random allocation sequence (such as sequentially numbered containers), describing any steps taken to conceal the sequence until interventions were assigned | 5                   |
| Implementation                                       | 10      | Who generated the random allocation sequence, who enrolled participants, and who assigned participants to interventions                                                                     | 5                   |
| Blinding                                             | 11a     | If done, who was blinded after assignment to interventions (for example, participants, care providers, those assessing outcomes) and how                                                    | -                   |
|                                                      | 11b     | If relevant, description of the similarity of interventions                                                                                                                                 | -                   |
| Statistical methods                                  | 12a     | Statistical methods used to compare groups for primary and secondary outcomes                                                                                                               | 6-7                 |
|                                                      | 12b     | Methods for additional analyses, such as subgroup analyses and adjusted analyses                                                                                                            | 6-7                 |
| <b>Results</b>                                       |         |                                                                                                                                                                                             |                     |
| Participant flow (a diagram is strongly recommended) | 13a     | For each group, the numbers of participants who were randomly assigned, received intended treatment, and were analysed for the primary outcome                                              | 7                   |
|                                                      | 13b     | For each group, losses and exclusions after randomisation, together with reasons                                                                                                            | 7-8                 |
| Recruitment                                          | 14a     | Dates defining the periods of recruitment and follow-up                                                                                                                                     | 8                   |
|                                                      | 14b     | Why the trial ended or was stopped                                                                                                                                                          | -                   |
| Baseline data                                        | 15      | A table showing baseline demographic and clinical characteristics for each group                                                                                                            | 7                   |
| Numbers analysed                                     | 16      | For each group, number of participants (denominator) included in each analysis and whether the analysis was by original assigned groups                                                     | 7                   |
| Outcomes and                                         | 17a     | For each primary and secondary outcome, results for each group, and the                                                                                                                     | 8-9                 |

|                          |     |                                                                                                                                           |                        |
|--------------------------|-----|-------------------------------------------------------------------------------------------------------------------------------------------|------------------------|
| estimation               |     | estimated effect size and its precision (such as 95% confidence interval)                                                                 |                        |
|                          | 17b | For binary outcomes, presentation of both absolute and relative effect sizes is recommended                                               | -                      |
| Ancillary analyses       | 18  | Results of any other analyses performed, including subgroup analyses and adjusted analyses, distinguishing pre-specified from exploratory | 9                      |
| Harms                    | 19  | All important harms or unintended effects in each group                                                                                   | 8                      |
| <b>Discussion</b>        |     |                                                                                                                                           |                        |
| Limitations              | 20  | Trial limitations, addressing sources of potential bias, imprecision, and, if relevant, multiplicity of analyses                          | 11-12                  |
| Generalisability         | 21  | Generalisability (external validity, applicability) of the trial findings                                                                 | 9                      |
| Interpretation           | 22  | Interpretation consistent with results, balancing benefits and harms, and considering other relevant evidence                             | 9-12                   |
| <b>Other information</b> |     |                                                                                                                                           |                        |
| Registration             | 23  | Registration number and name of trial registry                                                                                            | 5                      |
| Protocol                 | 24  | Where the full trial protocol can be accessed, if available                                                                               | Attached as appendix   |
| Funding                  | 25  | Sources of funding and other support (such as supply of drugs), role of funders                                                           | Attached as title page |

Table S3. P value for Schoenfeld Individual Test

| Covariates            | P value |
|-----------------------|---------|
| Treatment             | 0.869   |
| Sex                   | 0.721   |
| Age                   | 0.999   |
| Weight loss           | 0.944   |
| Tumor length          | 0.173   |
| Tumor Location        | 0.536   |
| Proximal tumor length | 0.730   |
| T stage               | 0.022   |
| Removed lymph nodes   | 0.708   |
| Grade                 | 0.780   |
| LVSI                  | 0.534   |
