# Supplementary material
Source: PubMed Central journal article supplement (PMC7160414)
Supplement: ONCO-25-e701-s003.pdf [file ONCO-25-e701-s003.pdf]

Supplemental Figures for:  
Postoperative Radiotherapy in Pathological T2-3N0M0 Thoracic Esophageal Squamous Cell Carcinoma: Interim Report of a  
Prospective, Phase III, Randomized Controlled Study  
Wei Deng et al.

Figure S1. Schoenfeld residuals plotted over time for each of the covariates in Table 1.

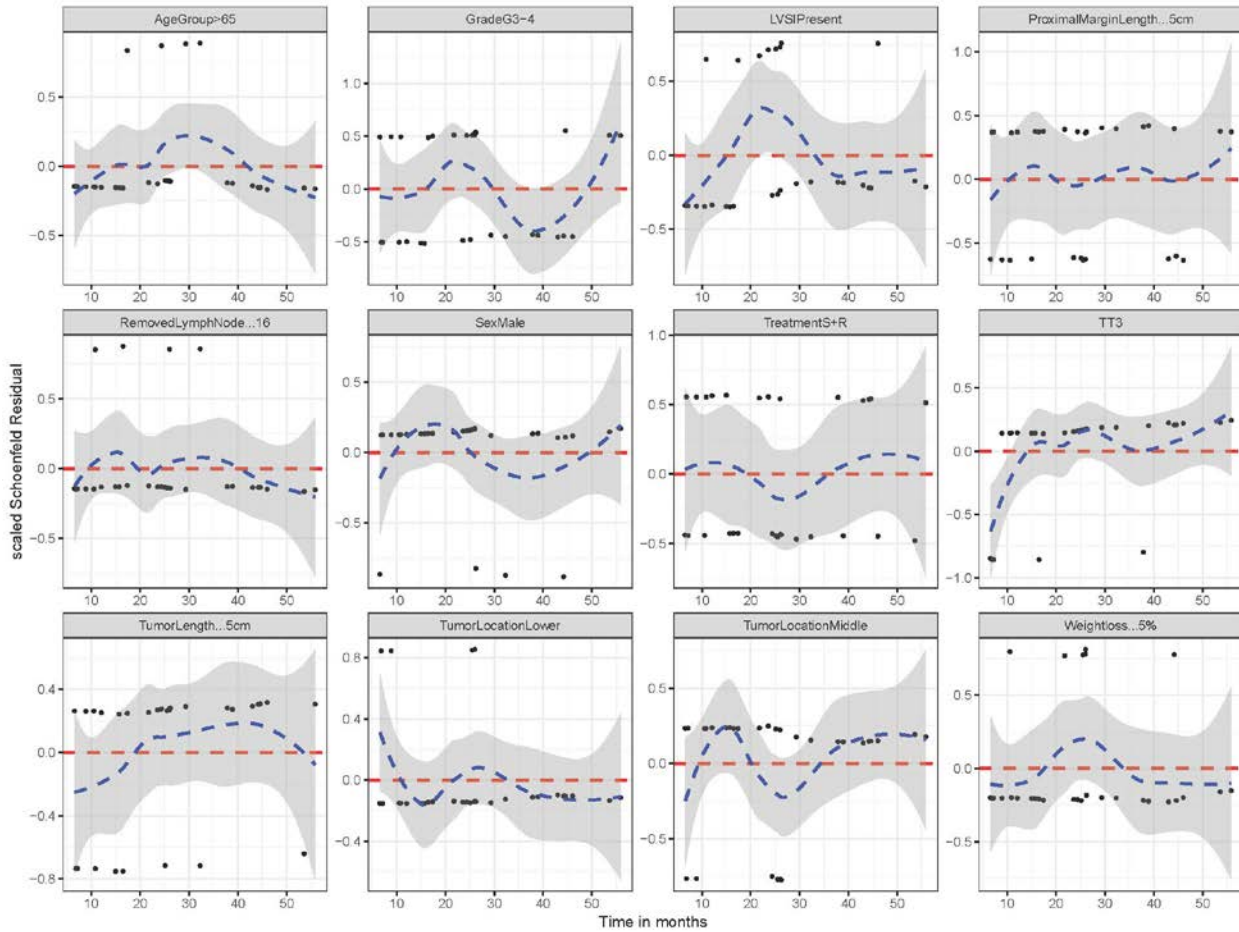

Figure S2A. Disease-free survival curves for surgery alone and postoperative radiotherapy groups with different T categories

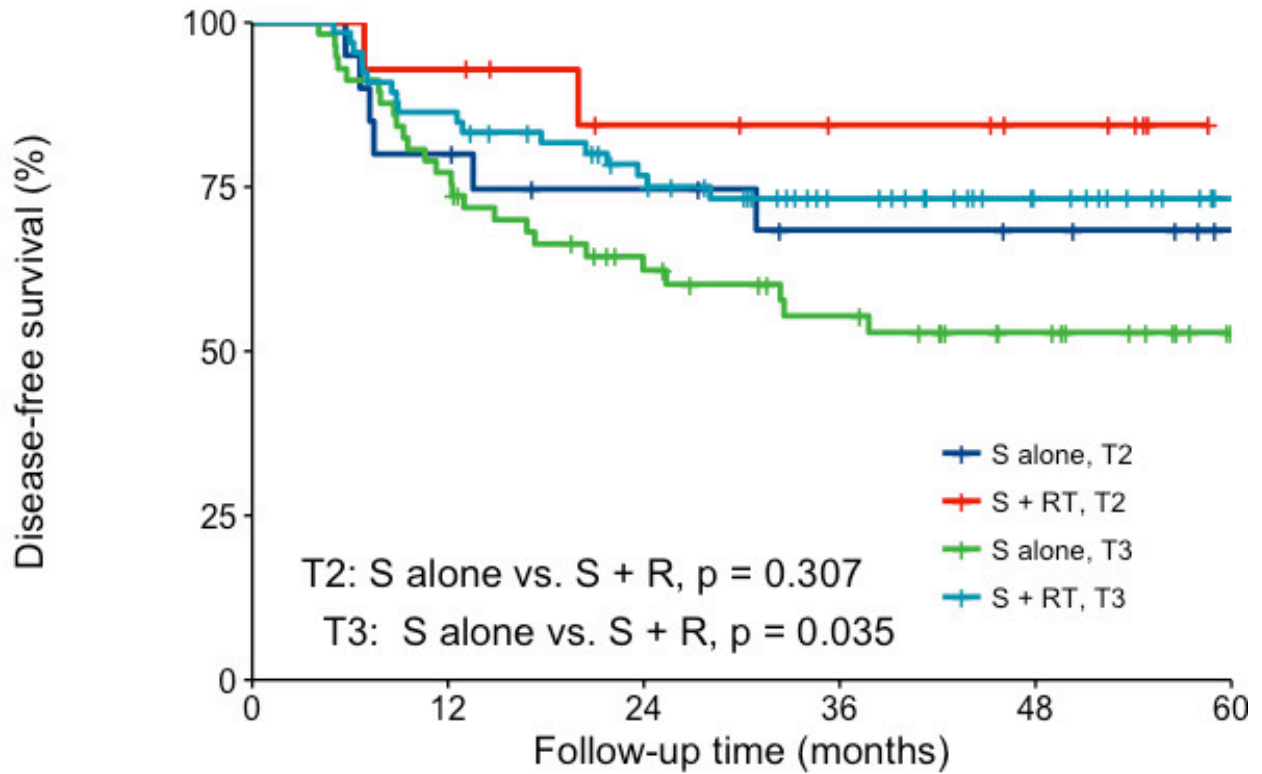

Number at risk

|             |    |    |    |    |    |   |
|-------------|----|----|----|----|----|---|
| S alone, T2 | 20 | 16 | 13 | 10 | 9  | 4 |
| S + RT, T2  | 14 | 13 | 9  | 7  | 5  | 0 |
| S alone, T3 | 57 | 44 | 30 | 23 | 15 | 5 |
| S + RT, T3  | 66 | 57 | 45 | 31 | 20 | 9 |

Figure S2B. Overall survival curves for surgery alone and postoperative radiotherapy groups with different T categories

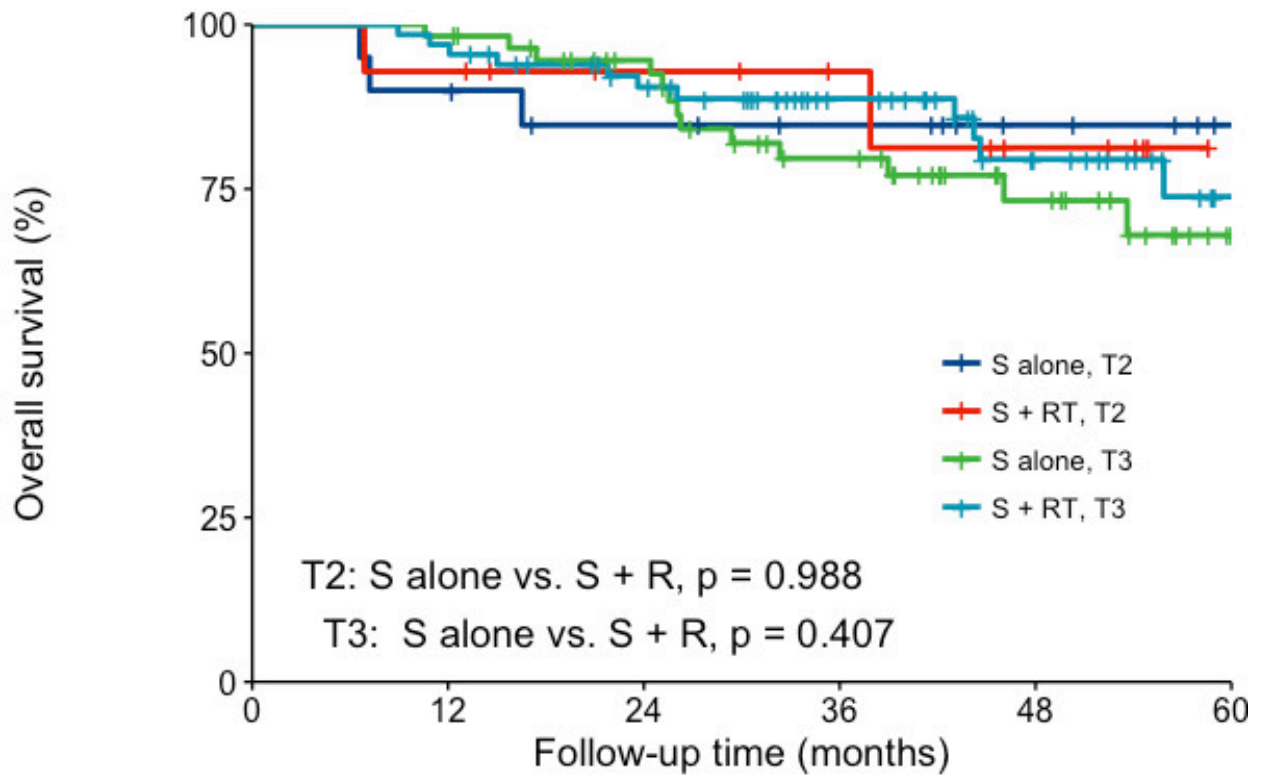

Number at risk

|             |    |    |    |    |    |   |
|-------------|----|----|----|----|----|---|
| S alone, T2 | 20 | 18 | 15 | 13 | 9  | 4 |
| S + RT, T2  | 14 | 13 | 10 | 8  | 5  | 0 |
| S alone, T3 | 57 | 56 | 46 | 33 | 19 | 5 |
| S + RT, T3  | 66 | 64 | 53 | 37 | 22 | 9 |

Figure S3A. Disease-free survival curves for surgery alone and postoperative radiotherapy groups with different tumor lengths

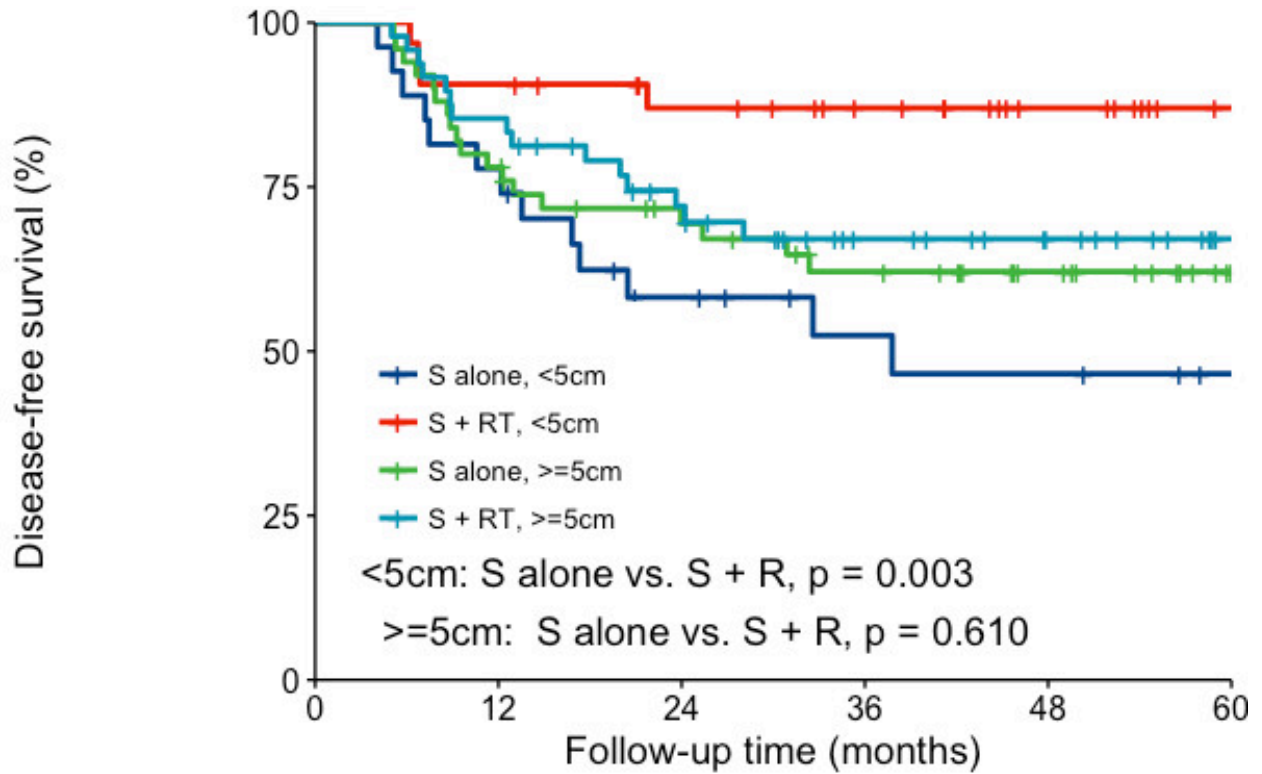

Number at risk

|                |    |    |    |    |    |   |
|----------------|----|----|----|----|----|---|
| S alone, <5cm  | 27 | 21 | 13 | 9  | 8  | 4 |
| S + RT, <5cm   | 32 | 29 | 24 | 19 | 12 | 5 |
| S alone, >=5cm | 50 | 39 | 30 | 24 | 16 | 5 |
| S + RT, >=5cm  | 48 | 41 | 30 | 19 | 13 | 4 |

Figure S3B. Overall survival curves for surgery alone and postoperative radiotherapy groups with different tumor lengths

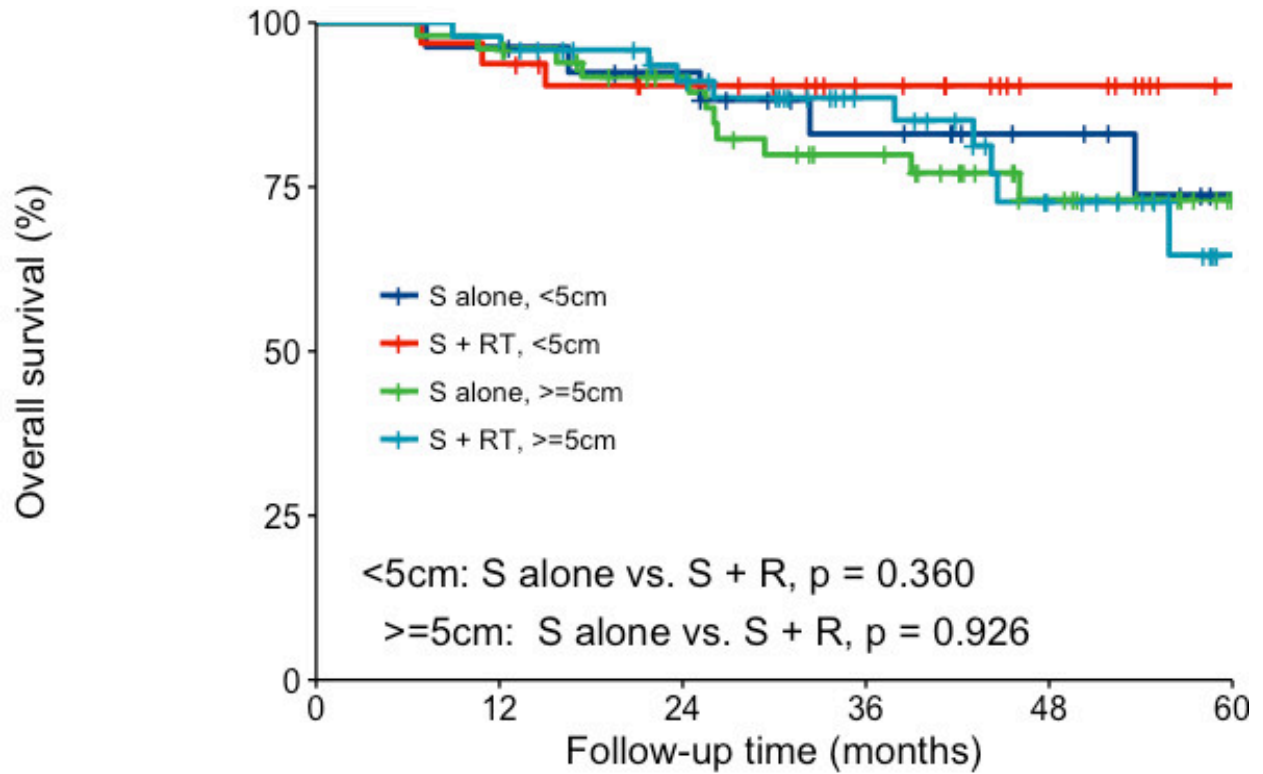

Number at risk

|                |    |    |    |    |    |   |
|----------------|----|----|----|----|----|---|
| S alone, <5cm  | 27 | 26 | 22 | 16 | 11 | 4 |
| S + RT, <5cm   | 32 | 30 | 25 | 19 | 12 | 5 |
| S alone, >=5cm | 50 | 48 | 39 | 30 | 17 | 5 |
| S + RT, >=5cm  | 48 | 47 | 38 | 26 | 15 | 4 |
